# Supplementary material
Source: Elsevier journal article supplement (https://www.sciencedirect.com/science/article/pii/S1679007316301566)
Supplement: mmc4 [file S1679007316301566:mmc4.docx]

REFERENCES RELATED TO THE DATA SOURCES OF TAILINGS DAM FAILURES TABLE

Blight, G.E., & Fourie, A.B., 2003. A review of catastrophic flow failures of deposits of mine waste and municipal refuse. In International Workshop on occurrence and mechanisms of flow in natural slopes and earthfills.

Costa, A., Felippe, M.F., & Reis, G., 2016. Licenciamento Ambiental de Grandes Empreendimentos Minerários: Dos Alarmes que Ninguém Escuta à Tragédia no Rio Doce. Revista Geografias 95-113.

CSP2, 2016. Tailings Dam Failures 1915 – 2016. Available at: <http://www.csp2.org/tailings-dam-failures-1915-2016>

Diehl, P. 2016. Chronology of major tailings dam failures. Available at: http://www.wiseuranium. org/mdaf.html.

ICOLD, U., 2001. Tailings Dams–Risk of Dangerous Occurrences, Lessons Learnt From Practical Experiences (Bulletin 121). Commission Internationale des Grands Barrages, Paris.

Riechers, J., 2012. Impact of Drilling in Embankment Dams: A Comparative study between Water Powered DTH Hammer Drilling Technology and Hydraulic Top Hammer Drills.

Samarco, 2016. Atualização do Plano de Recuperação Ambiental Integrado. Available at: <http://www.samarco.com/wp-content/uploads/2016/10/PLANO_INTEGRADO_rev01_071016.pdf>.
