# Supplementary material
Source: Elsevier journal article supplement (https://www.sciencedirect.com/science/article/pii/S1679007316301566)
Supplement: mmc5 [file S1679007316301566:mmc5.xlsx]

## Sheet: tailings dam failures
ID	Ano	Country	Location	Ore type	Dam Height (meters)	Storage Volume (Cubic meters)	Talings Releases - release volume (cubic meters)	runout - Tailings travel (km)	Deaths	References
1	1915	Chile	Agua Dulce, Sewell, VI Region, Rancagua	Copper	61		180000			CSP2 (2016)
2	1917	South Africa	Unidentified	Gold						CSP2 (2016)
3	1928	Chile	Barahona	Copper	61	20000000	2800000			Blight and Fourie (2003)
4	1937	South Africa	Simmer and Jack	Gold						CSP2 (2016)
5	1937	Mexico	Los Cedros, Tlalpujahua, Michoacán	Gold, Silver		9200000	10000000	11	>300	CSP2 (2016)
6	1939	Australia	Captains Flat Dump 6A	Copper						ICOLD, UNEP (2001)
7	1940	USA	St. Joe Lead, Flat Missouri	Lead	15					CSP2 (2016)
8	1941	USA	Kennecott, Garfield, Utah	Copper						ICOLD, UNEP (2001)
9	1942	Australia	Captains Flat Dump 3	Copper			40000			ICOLD, UNEP (2001)
10	1942	USA	Kennecott, Utah	Copper						ICOLD, UNEP (2001)
11	1944	Canada	Hollinger	Gold	15					ICOLD, UNEP (2001)
12	1947	USA	Castle Dome, Arizona	Copper			15000	0.1		ICOLD, UNEP (2001)
13	1948	Canada	Sullivan Mine, Kimberley, BC	Lead, Zinc			1100000			CSP2 (2016)
14	1951	USA	Unidentified, Peace River, Florida, 7/51	Phosphate	30					ICOLD, UNEP (2001)
15	1951	USA	Unidentified, Peace River, Florida, 2/51	Phosphate						ICOLD, UNEP (2001)
16	1951	USA	Unidentified, Peace River, Florida, 9/51	Phosphate	6					ICOLD, UNEP (2001)
17	1952	USA	Unidentified, Alfaria River, Florida, 2/52	Phosphate	8					CSP2 (2016)
18	1952	USA	Unidentified, Peace River, Florida, 3/52	Phosphate	8					ICOLD, UNEP (2001)
19	1956	South Africa	Grootvlei	Gold						ICOLD, UNEP (2001)
20	1959	USA	Union Carbide, Green River, Utah	Uranium			8400			ICOLD, UNEP (2001)
21	1960	USA	Lower Indian creek, MO	Lead						Bowker and Chambers (2015)
22	1961	United Kingdom	Tymawr	Coal				0.8		Bowker and Chambers (2015)
23	1961	USA	Union Carbide, Maybell Colorado	Uranium			280			Bowker and Chambers (2015)
24	1961	Belgium	Jupille	Coal					11	Blight and Fourie (2003)
25	1962	USA	Mines Development, Edgemont, South Dakota	Uranium			100			Bowker and Chambers (2015)
26	1962	Peru	Unidentified	?						Bowker and Chambers (2015)
27	1962	USA	American Cyanamid Florida	Gypsum			11356230			Bowker and Chambers (2015)
28	1962	China	Huogudu, Yunnan	Tin			3300000	4.5	171	Bowker and Chambers (2015)
29	1963	USA	Utah Construction, Riverton, Wyoming	Uranium						Bowker and Chambers (2015)
30	1964	USA	Alcoa, Texas	Aluminum	19	4500000				Bowker and Chambers (2015)
31	1965	Sweden	ryllshytte-magasinet	Cooper, Zinc	19	6500				Riechers (2012)
32	1965	Sweden	svappavaara	From Kiruna	18	6000				Riechers (2012)
33	1965	USSR	Nyukka Creek	?	12					Bowker and Chambers (2015)
34	1965	United Kingdom	Tymawr	Coal				0.8		Bowker and Chambers (2015)
35	1965	United Kingdom	Tymawr	Coal	12			0.7		ICOLD, UNEP (2001)
36	1965	Chile	Bellavista	Copper	20	450000	70000	0.8		Bowker and Chambers (2015)
37	1965	Chile	El Cobre New Dam	Copper	19	350000	350000	12		Bowker and Chambers (2015)
38	1965	Chile	El Cobre Old Dam	Copper	35	4250000	1900000	12	>200	Bowker and Chambers (2015)
39	1965	Chile	La Patagua New Dam	Copper	15		35000	5		Bowker and Chambers (2015)
40	1965	Chile	Cerro Negro no. 1 of 5	Copper	46		85000	5		Bowker and Chambers (2015)
41	1965	Chile	Cerro Negro no. 3 of 5	Copper	20	500000	85000	5		Bowker and Chambers (2015)
42	1965	Chile	El cobre no. 4	Copper	50					ICOLD, UNEP (2001)
43	1965	Chile	Hierro Viejo	Copper	5		800	1		Bowker and Chambers (2015)
44	1965	Chile	Los Maquis, Chile 3	Copper	15	43000	21000	5		Bowker and Chambers (2015)
45	1965	Chile	Cerro Negro No.3	Copper			85000			Bowker and Chambers (2015)
46	1965	Chile	Los Maquis, Chile 1	Copper	15		21000			Bowker and Chambers (2015)
47	1965	Chile	Cerro Negro no. 2 of 5	Copper	46					Bowker and Chambers (2015)
48	1965	Chile	El Cerrado	Copper	25					Bowker and Chambers (2015)
49	1965	Chile	El Cobre Small Dam	Copper	26	985000				Bowker and Chambers (2015)
50	1965	Chile	Ramayama n1	Copper	5		150			Bowker and Chambers (2015)
51	1965	Chile	Sauce 1	Copper	6					Bowker and Chambers (2015)
52	1965	Chile	Sauce 2	Copper	5					Bowker and Chambers (2015)
53	1965	Chile	Sauce 3	Copper	5					Bowker and Chambers (2015)
54	1965	Chile	sauce 4	Copper	5					Bowker and Chambers (2015)
55	1965	Chile	Cerro Blanco de Polpaico	Limestone	9					ICOLD, UNEP (2001)
56	1965	USA	American Cyanamid Florida #2	Phosphate						Bowker and Chambers (2015)
57	1965	USA	Unidentified, Idaho	Phosphate	18					Bowker and Chambers (2015)
58	1966	United Kingdom	Derbyshire	Coal	8		30000	0.1		Bowker and Chambers (2015)
59	1966	German Democratic Republic	Geising/Erzgebirge	Tin			70000			Bowker and Chambers (2015)
60	1966	United Kingdom	Aberfan, Wales	Coal		230000	162000		144	Bowker and Chambers (2015)
61	1966	United Kingdom	Williamthorpe	Coal						Bowker and Chambers (2015)
62	1966	United Kingdom	Williamthorpe n2	Coal						Bowker and Chambers (2015)
63	1966	USA	Gypsum Tailings Dam, Texas	Gypsum	11	7000000	85000	0.3		Bowker and Chambers (2015)
64	1966	Bulgaria	Mir mine, Sgorigrad	Lead, Zinc, Copper, Silver, (Uranium?)	45	1520000	450000	8	488	Bowker and Chambers (2015)
65	1966	USA	unidentified, East Texas	Gypsum	16		130000			Bowker and Chambers (2015)
66	1967	Sweden	Aitik	Cooper, Gold, Silver	50	250000				Riechers (2012)
67	1967	United Kingdom	Unidentified	Coal	30					Bowker and Chambers (2015)
68	1967	United Kingdom	Unidentified	Coal	20					Bowker and Chambers (2015)
69	1967	United Kingdom	Unidentified	Coal	14					Bowker and Chambers (2015)
70	1967	USA	Climax, Colorado	Molybdenum			12000			Bowker and Chambers (2015)
71	1967	USA	Mobil Chemical, Fort Meade, Florida	Phosphate			2000000			Bowker and Chambers (2015)
72	1968	United Kingdom	stoney middlenton	?						Bowker and Chambers (2015)
73	1968	Japan	Hokkaido	cooper	12	300000	90000	0.15		Bowker and Chambers (2015)
74	1968	USA	Agrico Chemical, Florida	Phosphate						Bowker and Chambers (2015)
75	1968	Canada	Imc k-2, Saskatchewan	Potassium	30					Bowker and Chambers (2015)
76	1969	Canada	Phoenix copper, BC	Copper			11356			CSP2 (2016)
77	1969	Spain	Bilbao	Iron			115000	0.035	?	Bowker and Chambers (2015)
78	1969	USA	Montsanto Dike 15, TN	Phosphate	43	1230000				Bowker and Chambers (2015)
79	1970	United Kingdom	Maggie Pie, Clay	Copper	18		15000	0.035		Bowker and Chambers (2015)
80	1970	Canada	Heath steele main dam, New Brunswick	?	30					ICOLD, UNEP (2001)
81	1970	United Kingdom	park	Clay	3					Bowker and Chambers (2015)
82	1970	United Kingdom	portworthy	Clay	15					Bowker and Chambers (2015)
83	1970	Zambia	Mufulira	Copper	50	1000000	625000		89	Bowker and Chambers (2015)
84	1970	USA	Unidentified, Missipi	Gypsum	15					Bowker and Chambers (2015)
85	1970	USA	Williamsport Washer, Maury County, Tennesse	Phosphate	21					ICOLD, UNEP (2001)
86	1971	USA	Western Nuclear, Jeffrey City, Wyoming	Uranium						Bowker and Chambers (2015)
87	1971	Romania	Certej gold mine	Gold	25		300000		89	CSP2 (2016)
88	1971	USA	Cities Service, Fort Meade, Florida	Phosphate	15	12340000	9000000	120		Bowker and Chambers (2015)
89	1971	Canada	Pinchi Lake, British Columbia	Mercury	13					Bowker and Chambers (2015)
90	1972	USA	Galena Mine, Idaho	Silver, Lead	14					ICOLD, UNEP (2001)
91	1972	USA	Buffalo Creek, West Virginia	Coal	14-18	500000	500000	64.4	125	Blight and Fourie (2003)
92	1972	USA	Ray Mine, Arizona	Copper	52					Bowker and Chambers (2015)
93	1973	USA	Unidentified, Southwestern USA	Copper	43	500000	170000	25		Bowker and Chambers (2015)
94	1973	USA	Earth Resources, N M	Copper	21					Bowker and Chambers (2015)
95	1973	USA	Ray Mine, Arizona inc #2 (Kennecott)	Copper	52					Bowker and Chambers (2015)
96	1974	USA	Silver king, Idaho	Silver	9	37000	6000			Bowker and Chambers (2015)
97	1974	France	Berrien	Silver, Lead	9					Bowker and Chambers (2015)
98	1974	USA	Unidentified Mississipi	Copper	20					Bowker and Chambers (2015)
99	1974	USA	Golden Gilpin Mine, Colorado	Gold	12					Bowker and Chambers (2015)
100	1974	Mexico	Unidentified, Canaca	Gypsum	46					Bowker and Chambers (2015)
101	1974	USA	Deneen Mica yansey county, North Carolina	Mica	18	300000	38000	0.03		Bowker and Chambers (2015)
102	1974	South Africa	Bafokeng	Platinum	20	17000000	3000000	45	12	Bowker and Chambers (2015)
103	1974	Canada	Gcos, Alberta	Oils Sands	61					Bowker and Chambers (2015)
104	1974	USA	Galena Mine, Idaho #2 of 2 (Asarco)	Silver, Lead	9		3800	0.61		Bowker and Chambers (2015)
105	1975	Canada	PCS Rocanville, Saskatchewan	Potassium	12		25000	1.5		Bowker and Chambers (2015)
106	1975	USA	Unidentified, Green River, Wyoming	Trona	18					Bowker and Chambers (2015)
107	1975	USA	Cadet no. 2, Montana	Barite	21					Bowker and Chambers (2015)
108	1975	USA	Dresser no. 4, Montana	Barite	15					Bowker and Chambers (2015)
109	1975	USA	Carr fork, utah, (Anaconda)	Copper, Gold	10					Bowker and Chambers (2015)
110	1975	Bulgaria	Madjarevo	Lead, Zinc, Gold	40	3000000	250000	20+		Bowker and Chambers (2015)
111	1975	USA	Silverton, Colorado	Gold, Silver			72500			Bowker and Chambers (2015)
112	1975	USA	Mike Horse, Montana	lead, zinc			150000			Bowker and Chambers (2015)
113	1975	Canada	Heath, steele main dam, Brunswick	Lead, Zinc	30					Bowker and Chambers (2015)
114	1975	USA	Mike Horse, Montana	Lead, Zinc	18	750000	150000			Bowker and Chambers (2015)
115	1975	USA	Keystone Mine, Crested Butte, Colorado	Molybdenum						Bowker and Chambers (2015)
116	1976	USA	Kerr-McGee, Churchrock, New Mexico	Uranium	9					Bowker and Chambers (2015)
117	1976	Sweden	enemossen	Zinc, Lead, Silver	25	7000				Riechers (2012)
118	1976	Sweden	kiruna	Iron	15	10000				Riechers (2012)
119	1976	China	Dashihe	Iron	37					Bowker and Chambers (2015)
120	1976	Yugoslavia	Zlevoto No.4	Lead, Zinc	25	1000000	300000			Bowker and Chambers (2015)
121	1976	USA	Unidentified, Idaho	Phosphate	34					Bowker and Chambers (2015)
122	1977	Australia	Pit no. 2 western australia	Ree	9					Bowker and Chambers (2015)
123	1977	USA	Western Nuclear, Jeffrey City, Wyoming, #2	Uranium			40			Bowker and Chambers (2015)
124	1977	USA	Homestake mining, Granst, Milan, New Mexico	Uranium	21		30000			Bowker and Chambers (2015)
125	1977	USA	Madison, Missouri	Lead	11					Bowker and Chambers (2015)
126	1977	USA	Unidentified, Hernando, County, Florida	Limestone	6					Bowker and Chambers (2015)
127	1978	Japan	Mochikoshi No.1	Gold	28	480000	80000	8	1	Bowker and Chambers (2015)
128	1978	Japan	Mochikoshi No.2	Gold	19	480000	80000	0.15	0	Bowker and Chambers (2015)
129	1978	Zimbabwe	Arcturus	Gold	25	1.8	18750	0.3	1	Bowker and Chambers (2015)
130	1978	Japan	Hirayama	Gold	9	87000				Bowker and Chambers (2015)
131	1978	Japan	Norosawa	Gold	24	225000				Bowker and Chambers (2015)
132	1978	Canada	Syncrude, Alberta	Oils Sands						Bowker and Chambers (2015)
133	1978	Sweden	laisvall	Lead, Zinc, Silver	40	20000				Riechers (2012)
134	1978	Sweden	malmberget	Iron	32	20000				Riechers (2012)
135	1979	Canada	Incident no1, Elliot Lake, Ontario	Uranium	9					Bowker and Chambers (2015)
136	1979	USA	Union Carbide, Uravan, Colorado	Uranium	43					Bowker and Chambers (2015)
137	1979	Canada	Unidentified, British Columbia	Uranium			40000			CSP2 (2016)
138	1979	USA	Churchill Copper, BC	Uranium			37854			CSP2 (2016)
139	1979	Canada	Suncor E-W Dike, Alberta	Oils Sands	30					Bowker and Chambers (2015)
140	1979	USA	United Nuclear, Churchrock, New Mexico	Uranium	11	370000	370625	110		Bowker and Chambers (2015)
141	1980	USA	Sweeney tailings dam, longmont, Colorado	Sand	7					Bowker and Chambers (2015)
142	1980	USA	phelpsdodge, Tyrone, New Mexico	Copper	66	2500000	2000000	8		Bowker and Chambers (2015)
143	1980	Chile	Arena, Sewell, VI Region, Rancagua, Chile El Tenete (Codelco)	Copper						CSP2 (2016)
144	1980	Chile	Marga, Sewell, VI Region, Rancagua, Chile El Teniente (Codelco)	Copper						CSP2 (2016)
145	1980	USA	Kyanite Mining, Virginia	Kyanite	11	430000				Bowker and Chambers (2015)
146	1981	Russia	Balka Chuficheva, Lebedinsky	Iron	25	27000000	3500000	1.3		Bowker and Chambers (2015)
147	1981	USA	Ages, Harlan County, Kentucky	Coal			96000	163	1	Bowker and Chambers (2015)
148	1981	Chile	Veta de Aqua A	Copper						Bowker and Chambers (2015)
149	1981	Chile	Veta de aqua B	Copper						Bowker and Chambers (2015)
150	1981	USA	Dixie Mine, Colorado	Gold						Bowker and Chambers (2015)
151	1981	USA	Texagulf 1 pond, Beaufort, Co, North Carolina	Phosphate		24700000				Bowker and Chambers (2015)
152	1982	Philippines	Sipalay, Negros Occidental	Copper			17500000			CSP2 (2016)
153	1982	Philippines	Sipalay, Phillippines, No.3 Tailings Pond (Maricalum Mining Corp)	Copper		37000000	17500000			Bowker and Chambers (2015)
154	1982	USA	Royster, Florida	Gypsum	21					Bowker and Chambers (2015)
155	1983	USA	Clayton Mine, Idaho	Silver, Lead	24	215000				Bowker and Chambers (2015)
156	1983	Chile	Vallenar 1 and 2	Copper						Bowker and Chambers (2015)
157	1983	USA	Golden Sunlight, MT	Gold						Bowker and Chambers (2015)
158	1983	USA	Grey Eagle, California,	Gold						Bowker and Chambers (2015)
159	1984	USA	Virgínia Virmiculite, Louisa County	Vermiculite	9					Bowker and Chambers (2015)
160	1984	USA	Battle Mt. Gold, Nevada	Gold	8	1540000				Bowker and Chambers (2015)
161	1984	Ukraine	Mirolubovka	Iron	32	80000000	none			Bowker and Chambers (2015)
162	1984	USA	Texagulf 4B pond, Beaufort, Co, North Carolina	Phosphate	8	12300000				Bowker and Chambers (2015)
163	1985	USA	Ollinghouse, Wadsworth, Nevada	Gold	5	120000	25000	1.5		Bowker and Chambers (2015)
164	1985	Canada	Quintette, MaËmot, BC	Coal			2500000	2.5		Blight and Fourie (2003)
165	1985	Chile	Cerro Negro No.4 of 5	Copper	40	2000000	500000	8		Bowker and Chambers (2015)
166	1985	Chile	Veta de Agua No.1, Chile	Copper	24	700000	280000	5		Bowker and Chambers (2015)
167	1985	Chile	Cerro Negro no.4	Copper	40	2000000	500000	8		ICOLD, UNEP (2001)
168	1985	USA	La Belle, Pennsylvania	Coal	79	1230000				Bowker and Chambers (2015)
169	1985	Italy	Prestavel mine, Stava, Trento	Fluorite	29.5	300000	200000	8	269	Bowker and Chambers (2015)
170	1985	Chile	El Cobre no. 4 - El Soldado	Copper	50					Bowker and Chambers (2015)
171	1985	Chile	Marga, El Teniente (Codelco)	Copper						Bowker and Chambers (2015)
172	1985	China	Niujiaolong, Shizhuyuan Non-ferrous Metals Co., Human	Phosphate			731000	4.2	49	Bowker and Chambers (2015)
173	1985	USA	Bonsal, North Carolina	Sand, Gravel	6	38000	11000	0.8		ICOLD, UNEP (2001)
174	1986	USA	Spring Creek Plant, Borger, Texas	Sand	5	30000				Bowker and Chambers (2015)
175	1986	Tasmania	Rossarden	Tin	7.10	200000				Bowker and Chambers (2015)
176	1986	Tasmania	Story's Creek	Tin	17	30000	minimal			Bowker and Chambers (2015)
177	1986	USA	Marianna Mine, #58, PA	Coal	37	300000				Bowker and Chambers (2015)
178	1986	Philippines	Lepanto, Mankayan, Benguet	Cooper, Gold						Bowker and Chambers (2015)
179	1986	Philippines	Mankayan, Luzon, no. 3 Tailings pond	Copper, Gold			100000?			Bowker and Chambers (2015)
180	1986	Brazil	Itabirito, Minas Gerais	Iron	30		62500	12	7	Costa et al. (2016)
181	1986	Brazil	Pico de São Luis, Gerais	Iron	20					Bowker and Chambers (2015)
182	1986	China	Huangmeishan	Iron					19	Bowker and Chambers (2015)
183	1986	Canada	Mineral King, BC	Lead, Zinc	6	small				Bowker and Chambers (2015)
184	1986	USA	Big Four, Florida	Phosphate	18					ICOLD, UNEP (2001)
185	1986	USA	Bonsal, North Carolina	Sand	6	38000	11000	0.8		Bowker and Chambers (2015)
186	1987	USA	Montcoal No.7, Raleigh County, West Virginia	Coal			87000	80		Bowker and Chambers (2015)
187	1987	Western Siberia	Bekovsky	Coal	53	52000000	none			Bowker and Chambers (2015)
188	1987	Philippines	Surigao del Norte Placer (#1 of 3)	Gold						Bowker and Chambers (2015)
189	1987	USA	Montana Tunnels, MT	Gold	33	250000				Bowker and Chambers (2015)
190	1987	China	Xishimen	Iron	31		2230			Bowker and Chambers (2015)
191	1988	USA	Tennessee Consolidated No.1, Grays Creek, TN	Coal	85	1000000	250000			Bowker and Chambers (2015)
192	1988	USA	Rain Starter dam, Elko, Nevada	Gold	27	1500000				Bowker and Chambers (2015)
193	1988	USA	Unidentified, Hernando, County, Florida	Limestone	12					Bowker and Chambers (2015)
194	1988	USA	Unidentified, Hernando, County, Florida #2	Limestone	12	3300000	4600			Bowker and Chambers (2015)
195	1988	China	Jinduicheng, Shaanxi Province	Molybdenum	40		700000		20	Bowker and Chambers (2015)
196	1988	USA	Riverview, Florida	Phosphate			246			CSP2 (2016)
197	1989	USA	Stancil, Perryville, Maryland	Sand, Gravel	9	74000	38000	0.1		Bowker and Chambers (2015)
198	1989	USA	Silver king, Idaho	Silver, Lead	9	37000	small			Bowker and Chambers (2015)
199	1989	USA	Soda Lake, California	Sodium	3					Bowker and Chambers (2015)
200	1989	USA	Southern Clay, Tenessee	Clay	5		300			Bowker and Chambers (2015)
201	1989	USA	Cyprus Thompson Creek, Idaho	Molybdenum	146	27000000	38000	0.1		Bowker and Chambers (2015)
202	1989	USA	Big Four, Florida	Phosphate						Bowker and Chambers (2015)
203	1990	Canada	Matachewan Mines, Kirtland Lake, Ontario	?			190000	168		CSP2 (2016)
204	1990	USA	Brewer Gold Mine Jefferson South Carolina	Gold			41640	80		CSP2 (2016)
205	1991	Hungary	Ajka Alumina Plant, Kolontár	Aluminum			43200			(2012
206	1991	Canada	Iron Dyke, Sullivan Mine, Kimberley, British Columbia	Lead, Zinc	21		75000			Bowker and Chambers (2015)
207	1992	Bulgaria	Maritsa Istok 1, near Stara Zagora	Coal	15	52000000	500000			Bowker and Chambers (2015)
208	1992	Philippines	No.2 tailings pond, Padcal, Luzon	Copper		50000000	32243000			Bowker and Chambers (2015)
209	1992	Montenegro	Kojkovac	Lead, Zinc		3500000	none			Bowker and Chambers (2015)
210	1993	Philippines	Marcopper, Marinduque Island, Mogpog Philippines (12/6) (#1 of 2)	Cooper					2	Bowker and Chambers (2015)
211	1993	Zambia	TD7, Chingola	Cooper	5		63			Bowker and Chambers (2015)
212	1993	South Africa	Saaiplaas, 2 failures on west ring dyke (18-19Mar93)	Gold						Bowker and Chambers (2015)
213	1993	Peru	Marsa	Gold					6	Bowker and Chambers (2015)
214	1993	South Africa	Saaiplaas, 2 failures on west ring dyke (18-19Mar93)	Gold	28		minimal			CSP2 (2016)
215	1993	South Africa	Saaiplaas, failure on south ring dyke (22Mar93)	Gold	28		minimal			Blight and Fourie (2003)
216	1993	Philippines	Itogon-Suyoc, Baguio gold district, Luzon	Gold, Silver						Bowker and Chambers (2015)
217	1993	USA	Gibsonton, Florida	Phosphate						CSP2 (2016)
218	1994	South Africa	Harmony, Merriespruit	Gold	31	5.88235e+06	600000	2	17	Bowker and Chambers (2015)
219	1994	South Australia	Olympic Dam, Roxby Downs	Copper, Uranium			5000000			Bowker and Chambers (2015)
220	1994	Brazil	Crixas, Goias	Gold	41	1406250	none			Bowker and Chambers (2015)
221	1994	China	Longjiaoshan, Daye Iron Ore Mine, Hubei	Iron					31	Bowker and Chambers (2015)
222	1994	USA	Fort Meade, Florida, cargill phosphate #3 of 3	Phosphate			76000			CSP2 (2016)
223	1994	USA	Fort Meade, Florida	Phosphate			76000			CSP2 (2016)
224	1994	USA	Hopewell Mine, Hillsborough County, Florida	Phosphate			1900000			Bowker and Chambers (2015)
225	1994	USA	IMC-Agrico, Florida	Potash						ICOLD, UNEP (2001)
226	1994	USA	Payne Creek Mine, Polk County, Florida	Phosphate			6800000			Bowker and Chambers (2015)
227	1995	Guyana	Omai Mine, Tailings dan no 1, 2	Gold	44	5250000	4200000	80		Bowker and Chambers (2015)
228	1995	Australia	Middle Arm, Launceston, Tasmania	Gold	4	25000	5000			Bowker and Chambers (2015)
229	1995	Philippines	Negros Occidental, Bulawan Mine, Sipalay River	Gold						Bowker and Chambers (2015)
230	1995	Tasmania	Riltec, Mathinna	Gold	7	120000	40000			Bowker and Chambers (2015)
231	1995	New Zealand	Golden Cross, Waitekauri Valley	Gold	27.10	3000000	none			Bowker and Chambers (2015)
232	1995	Philippines	placer bay, Surigao del Norte Placer (#2 of 3)	Gold	17		50000		12	Bowker and Chambers (2015)
233	1996	Philippines	Marcopper, Marinduque Island, Philippines	Copper			1600000	25		Bowker and Chambers (2015)
234	1996	Peru	Amatista, Nazca	?			300000			Bowker and Chambers (2015)
235	1996	Bulgaria	Sgurigrad	Lead, Zinc	45	1520000	220000	6		Blight and Fourie (2003)
236	1996	Bolivia	El Porco	Zinc, Lead, Silver			250000	300		Bowker and Chambers (2015)
237	1997	Chile	Maiten, IV Region, Vallenar	?	15					CSP2 (2016)
238	1997	Chile	Tranque Antiguo Planta La Cocinera	?	30		60	0.16		CSP2 (2016)
239	1997	USA	Pinto Valley, Arizona	Copper			230000			Bowker and Chambers (2015)
240	1997	Chile	Algaroobo, Vallenar	Iron	18					CSP2 (2016)
241	1997	Chile	Algaroobo, Vallenar	Iron	20					CSP2 (2016)
242	1997	Philippines	Zamboanga Del Norte, Sibutad Gold Project	Gold						Bowker and Chambers (2015)
243	1997	USA	Mulberry Phosphate, Polk County, Florida	Phosphate			200000			CSP2 (2016)
244	1998	Spain	Huelva	Phosphate			50000			Bowker and Chambers (2015)
245	1998	Spain	Los Frailes, Aznalcóllar	Zinc, Lead, Copper, Silver	27	15000000	4500000	41		Bowker and Chambers (2015)
246	1999	Philippines	Placer, Surigao del Norte	Gold			437500	12	4	Bowker and Chambers (2015)
247	1999	Philippines	Toledo City	Copper			5700000			Bowker and Chambers (2015)
248	1999	Canada	Red Mountain, BC	Gold, Silver			10000			CSP2 (2016)
249	2000	Sweden	Aitik mine, Gällivare	Copper	15	15000000	4000000	5.2		Bowker and Chambers (2015)
250	2000	China	Nandan county, Guangxi province	Tin					28	Bowker and Chambers (2015)
251	2000	USA	Inez, Martin County, Kentucky	Coal			950000	120		Bowker and Chambers (2015)
252	2000	Romania	Baia Mare	Gold recovery from old tailings	A few m	800000	100000	>100		Bowker and Chambers (2015)
253	2000	Romania	Borsa	Lead, Zinc			13750			Bowker and Chambers (2015)
254	2001	Brazil	Sebastião das Águas Claras, Nova Lima district, Minas Gerais	Iron				8	5	Costa et al. (2016)
255	2002	Philippines	San Marcelino, Zambales	Copper						Bowker and Chambers (2015)
256	2002	Chile	El Cobre	Copper			4500			Bowker and Chambers (2015)
257	2002	Chile	El Cobre, no. 2, 3, 4, 5	Copper			8000			Bowker and Chambers (2015)
258	2002	Philippines	San Marcelino, Zambales	Copper, Gold		47000000	1000000			CSP2 (2016)
259	2003	Brazil	Cataguazes, Minas Gerais	Aluminum			1200000	6.4	5	Costa et al. (2016)
260	2003	Chile	Cerro Negro, Petorca prov., Quinta Region	Copper			31250	20		Bowker and Chambers (2015)
261	2003	Macedonia	Sasa Mine	Lead, Zinc		2000000	85000	12		CSP2 (2016)
262	2004	Russia	Partizansk, Primorski Krai	Coal Ash		20000000	160000			Bowker and Chambers (2015)
263	2004	France	Malvési, Aude	decantation and evaporation pond of uranium conversion plant			30000			Bowker and Chambers (2015)
264	2004	Canada	Pinchi Lake, British Columbia	Mercury	12		7000			Bowker and Chambers (2015)
265	2004	USA	Riverview, Florida	Phosphate			227000			Bowker and Chambers (2015)
266	2005	USA	Bangs Lake, Jackson County, Mississippi	Phosphate			64350			CSP2 (2016)
267	2006	Portugal	Fonte Santa, Freixa de Espado a Cinta	?	12		93940	17.5		CSP2 (2016)
268	2006	Brazil	Cataguazes, Minas Gerais	Aluminum			400000			CSP2 (2016)
269	2006	Zambia	Nchanga, Chingola	Copper						CSP2 (2016)
270	2006	China	near Miliang, Zhen'an County, Shangluo, Shaanxi Province	Gold				5	17	Bowker and Chambers (2015)
271	2007	Brazil	Miraí, Minas Gerais	Bauxite			2000000		0	Costa et al. (2016)
272	2007	United Kingdom	Glebe Mines	Iron			20000			Bowker and Chambers (2015)
273	2008	USA	Kingston fossil plant, Harriman, Tennessee	Coal Ash			4100000	4.1		Bowker and Chambers (2015)
274	2008	China	Taoshi, Linfen City, Xiangfen county, Shanxi province	Iron	50.7	290000	190000	2.5	277	Bowker and Chambers (2015)
275	2009	Russia	Karamken, Magadan region	Gold	20		1200000		1	Bowker and Chambers (2015)
276	2009	China	Huayuan County, Xiangxi Autonomous Prefecture, Hunan Province	Manganese			50000		3	Bowker and Chambers (2015)
277	2010	Chile	Tranque Adosado Planta Alhué, Alhué, Region Metropolitana	?	15					CSP2 (2016)
278	2010	Chile	Tranque Adosado Planta Alhué, Alhué, Region Metropolitana (Florida Mining)	?						CSP2 (2016)
279	2010	Chile	Las Palmas, Pencahue, VII Region, Maule (COMINOR)	?	15			0.5	4	CSP2 (2016)
280	2010	Hungary	Ajka Alumina Plant, Kolontár (MAL Magyar Aluminum)	Aluminum		30000000	1000000		10	CSP2 (2016)
281	2010	Hungary	Kolontár	Bauxite			700000			CSP2 (2016)
282	2010	Peru	Huancavelica	Silver, Copper, Lead, Zinc	10		21420	110		CSP2 (2016)
283	2011	Canada	Bloom Lake, Newfoundland, Cleveland Cliffs	Iron			200000			CSP2 (2016)
284	2011	China	Mianyang City, Songpan County, Sichuan Province	Manganese			10000			CSP2 (2016)
285	2012	Canada	Former Gullbridge mine site, Newfoundland	Copper	7		100000			CSP2 (2016)
286	2012	Canada	Gullbridge Mine Newfoundland	Copper	7		100000			CSP2 (2016)
287	2012	Philippines	Padcal No 3, Benquet Philippines (Philex)	Copper		102000000	13000000			CSP2 (2016)
288	2012	Bagong Alyansang Makabayan	Johson Gold Mining Corporation	Gold						CSP2 (2016)
289	2012	Canada	Hudson Bay (HB) Mine, Salmo, British Columbia (Regional District of Central Kootenay & Teck)	Lead, Zinc		1800000	nil			CSP2 (2016)
290	2012	Finland	Sotkamo, Kainuu province	Nickel, (Uranium by-product planned)			2000000			CSP2 (2016)
291	2012	Finland	Sotkamo, Kainuu Province	Nickel, Uranium			240000			CSP2 (2016)
292	2013	Canada	Obed Mountain Coal Mine, northeast of Hinton, Alberta	Coal			670000	113		CSP2 (2016)
293	2013	Armenia	Zangezur Copper Molybdenum Combine , Kajaran, Syunik province	Copper, Molybdenum						CSP2 (2016)
294	2013	Canada	Casa Berardi Mine, La Sarre, Abitibi region, Quebec (Hecla Mining Company)	Gold			57000			CSP2 (2016)
295	2014	USA	Dan River Steam Station, Eden, North Carolina	Coal Ash		155000000	148706			CSP2 (2016)
296	2014	Canada	Imperial Metals, Mount Polley mine, near Likely, British Columbia	Copper, Gold	40	74000000	23600000	7		CSP2 (2016)
297	2014	Mexico	Buenavista del Cobre mine, Cananea, Sonora	Copper			40000			CSP2 (2016)
298	2014	Brazil	Herculano mine, Itabirito, Região Central, Minas Gerais	Iron					3	Costa et al. (2016)
299	2015	Canada	Yellow Giant Mine, Banks Island, British Columbia	Gold			240	1		CSP2 (2016)
300	2015	Brazil	Germano mine, Bento Rodrigues, distrito de Mariana, Região Central, Minas Gerais	Iron	90	55000000	43000000	668	19	Samarco (2016)
301	2015	Myanmar	Hpakant, Kachin state	Jade						CSP2 (2016)
302	2015	USA	Gold King Mine, near Silverton, Colorado	Gold	n/a	11356	11356	1	0	CSP2 (2016)
303	2016	China	Xiangjiang Wanji Aluminum	Bauxite			2000000			CSP2 (2016)
304	2016	USA	New Wales plant, Mulberry, Polk County, Florida	Phosphate			840000			CSP2 (2016)
305	1997	USA	Pinto Valley Arizona	Cooper						CSP2 (2016)
306	?	Peru	Casapalca	Tetrahedrite	107					ICOLD, UNEP (2001)
307	?	Peru	Casapalca	Tetrahedrite	107					ICOLD, UNEP (2001)
308	1953	Sweden	Gillervattnet, Boliden	Zinc, Cooper, Lead,Silver, Gold	12	20000				Blight and Fourie (2003)
	36 cases with complete data to PCA analysis.
